# Supplementary material
Source: bioRxiv or medRxiv preprint supplement (https://www.biorxiv.org/highwire/filestream/89717/field_highwire_adjunct_files/4/289249-5.pdf)
Supplement: Supplementary file [file 289249-5.pdf]

**Data Sheet 5.** Populations and percentage of rural populations of African countries that have been affected by Ebolavirus outbreaks.

| <b>Country</b>            | <b>Population</b>                   | <b>% Rural population</b> |
|---------------------------|-------------------------------------|---------------------------|
| Côte d'Ivoire             | 23,254,184 <sup>1</sup>             | 46 <sup>1</sup>           |
| Democratic Republic Congo | 79,722,624                          | 58                        |
| Gabon                     | 1,763,142                           | 13                        |
| Guinea                    | 12,947,122                          | 63                        |
| Liberia                   | 4,615,222                           | 50                        |
| Mali                      | 18,134,835                          | 60                        |
| Nigeria                   | 186,987,563                         | 52                        |
| Republic of the Congo     | 4,740,992                           | 35                        |
| Senegal                   | 15,589,485                          | 56                        |
| Sierra Leone              | 6,592,102                           | 60                        |
| South Africa              | 54,978,907                          | 35                        |
| South Sudan               | 12,733,427                          | 81                        |
| Uganda                    | 40,322,768                          | 84                        |
|                           | <b>Total:</b><br><b>462,382,373</b> |                           |

<sup>1</sup> Data derived from the world bank website (<http://www.worldbank.org>, last accessed on 17<sup>th</sup> October 2017)
